# Supplementary material for: Graphene-based frustrated Lewis pairs as bifunctional catalysts for CO2 reduction via the dissociative chemisorption of molecular H2: a periodic density functional perspective
Source: Royal Society of Chemistry journal article supplement (doi:10.1039/d1nj00970b), 2021-01-01
Supplement: d1nj00970b1.pdf [file d1nj00970b1.pdf]

## Supplementary Information

### Graphene Based Frustrated Lewis Pairs as Bifunctional Catalyst for CO<sub>2</sub> Reduction via Dissociative chemisorption of molecular H<sub>2</sub>: A Periodic Density Functional Perspective

Thillai Govindaraja Senthamaraikannan,<sup>a,1</sup> Sailaja Krishnamurthy<sup>b</sup> and Selvaraj Kaliaperumal<sup>a\*</sup>

<sup>a</sup> Nano and Computational Material Laboratory, Catalysis Division,

CSIR-National Chemical Laboratory, Pune 411 008, India

<sup>b</sup> Physical Chemistry Division, CSIR-National Chemical Laboratory, Pune 411 008, India

\*Email: [k.selvaraj@ncl.res.in](mailto:k.selvaraj@ncl.res.in)

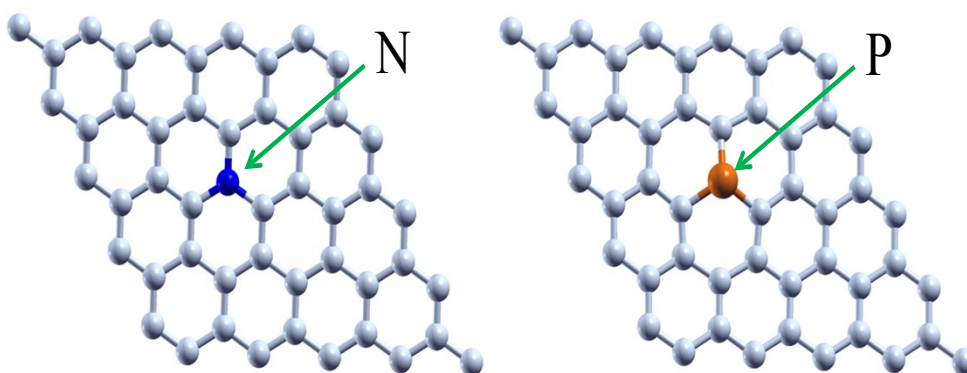

Supplementary Figure 1. The Optimised conformations of nitrogen and phosphorous doped Nano Graphene.

Supplementary Table 1. The Structural parameters of optimized FLPs

| FLPs                                                                    | NG-B<br>(Å) | NG-Al<br>(Å) | NG-Ga<br>(Å) | NG-In<br>(Å) | PG-B<br>(Å) | PG-Al<br>(Å) | PG-Ga<br>(Å) | PG-In<br>(Å) |
|-------------------------------------------------------------------------|-------------|--------------|--------------|--------------|-------------|--------------|--------------|--------------|
| Interatomic<br>distance<br>between<br>Fluorine<br>atom on<br>Lewis acid | 3.88        | 3.87         | 3.87         | 4.07         | 3.73        | 3.86         | 3.93         | 4.07         |
|                                                                         | 3.15        | 3.20         | 3.17         | 3.16         | 3.30        | 3.27         | 3.30         | 3.20         |
|                                                                         | 3.30        | 3.43         | 3.45         | 3.39         | 3.31        | 3.48         | 3.46         | 3.39         |

<sup>1</sup> Department of Environmental Engineering, Chungbuk National University,

Chungdae-ro 1, Seowon-gu, Cheongju, Chungbuk 28644, Republic of Korea

|  |      |      |      |      |      |      |      |      |
|--|------|------|------|------|------|------|------|------|
|  | 3.67 | 3.66 | 3.69 | 3.76 | 3.93 | 3.84 | 3.82 | 3.90 |
|  | 4.54 | 4.49 | 4.49 | 4.71 | 4.35 | 4.32 | 4.24 | 4.32 |
|  | 3.66 | 3.75 | 3.75 | 3.93 | 3.63 | 3.81 | 3.69 | 3.85 |
|  | 3.28 | 3.22 | 3.21 | 3.24 | 3.38 | 3.35 | 3.32 | 3.30 |
|  | 3.16 | 3.24 | 3.26 | 3.28 | 3.33 | 3.40 | 3.41 | 3.32 |
|  | 3.69 | 3.72 | 3.72 | 3.83 | 3.83 | 3.84 | 3.87 | 3.89 |
|  | 4.45 | 4.37 | 4.38 | 4.65 | 4.43 | 4.32 | 4.35 | 4.44 |

**Supplementary Table 2.** The Bader Charge analysis of FLPs w.r.t Lewis acid and base

| FLPs  | Charge on N atom/P atom (e) | Charge on N atom/P atom in uncomplexed Lewis base (e) | B (e)                                                                | Al (e)      | Ga (e)      | In (e)      |
|-------|-----------------------------|-------------------------------------------------------|----------------------------------------------------------------------|-------------|-------------|-------------|
|       |                             |                                                       | Charge on atom in the uncomplexed Lewis acid is given in parenthesis |             |             |             |
| NG-B  | -1.22                       | -0.90 (N atom)                                        | 1.86 (1.87)                                                          |             |             |             |
| NG-Al | -1.24                       |                                                       |                                                                      | 2.23 (2.22) |             |             |
| NG-Ga | -1.25                       |                                                       |                                                                      |             | 1.21 (1.27) |             |
| NG-In | -1.22                       |                                                       |                                                                      |             |             | 1.24 (1.16) |
| PG-B  | 1.67                        | 1.59 (P atom)                                         | 1.89 (1.87)                                                          |             |             |             |
| PG-Al | 1.62                        |                                                       |                                                                      | 2.22 (2.22) |             |             |
| PG-Ga | 1.68                        |                                                       |                                                                      |             | 1.22 (1.27) |             |
| PG-In | 1.60                        |                                                       |                                                                      |             |             | 1.24 (1.16) |

**Supplementary Table 3.** The Bader Charge analysis of NG-B and PG-B FLPs with respect to carbon atoms attached to dopants on N/P doped FLPs. (only NG-B and PG-B FLPs are reported as case study)

| FLPs             | Atom                                      | N/P-FLPs<br>(e) | H <sub>2</sub> —N/P-FLPs<br>(e) | CO <sub>2</sub> on H <sub>2</sub> —N/P-<br>FLPs (e) |
|------------------|-------------------------------------------|-----------------|---------------------------------|-----------------------------------------------------|
| NG-B             | N<br>LB-N (-0.90)                         | -1.22           | -0.95                           | -1.12                                               |
|                  | C (carbon atoms<br>attached to<br>dopant) | 0.24            | 0.05                            | 0.13                                                |
|                  |                                           | <b>0.43</b>     | <b>0.21</b>                     | <b>0.51</b>                                         |
|                  |                                           | 0.36            | 0.06                            | 0.34                                                |
| B<br>LA-B (1.87) | 1.86                                      | 1.84            | 1.81                            |                                                     |
| PG-B             | P<br>LB-P (1.59)                          | 1.66            | 2.43                            | -0.65                                               |
|                  | C (carbon atoms<br>attached to<br>dopant) | -0.70           | -0.72                           | -0.63                                               |
|                  |                                           | <b>-0.64</b>    | <b>-0.55</b>                    | <b>-0.46</b>                                        |
|                  |                                           | -0.50           | -0.65                           | -0.60                                               |
| B<br>LA-B (1.87) | 1.89                                      | 1.84            | 1.83                            |                                                     |

**Supplementary Table 4.** The adsorption energy analysis of NG and PG FLPs with respect to (1) Dissociative adsorbed H<sub>2</sub>, (2) CO<sub>2</sub> adsorption on H<sub>2</sub> adsorbed surface and (3) HCOOH adsorption (adsorption trend on NG and PG system are used as a reference for 1 and 2)

| FLPs                  | 1                                              | 2                                                                  | 3                     |
|-----------------------|------------------------------------------------|--------------------------------------------------------------------|-----------------------|
|                       | Dissociative adsorption of H <sub>2</sub> (eV) | CO <sub>2</sub> adsorption on H <sub>2</sub> adsorbed surface (eV) | HCOOH adsorption (eV) |
| NG (N-doped graphene) | -6.48                                          | -0.26                                                              |                       |
| NG-B                  | 2.27                                           | -0.39                                                              | 0.62                  |
| NG-Al                 | 2.14                                           | -0.33                                                              | 0.54                  |
| NG-Ga                 | 2.15                                           | -0.39                                                              | 0.51                  |
| NG-In                 | 2.12                                           | -0.32                                                              | 0.63                  |
| PG (P-doped graphene) | -6.14                                          | -0.23                                                              |                       |
| PG-B                  | 0.40                                           | 0.10                                                               | 0.57                  |
| PG-Al                 | 0.55                                           | -0.08                                                              | 0.57                  |
| PG-Ga                 | 0.45                                           | -0.09                                                              | 0.51                  |
| PG-In                 | 0.44                                           | -0.13                                                              | 0.50                  |

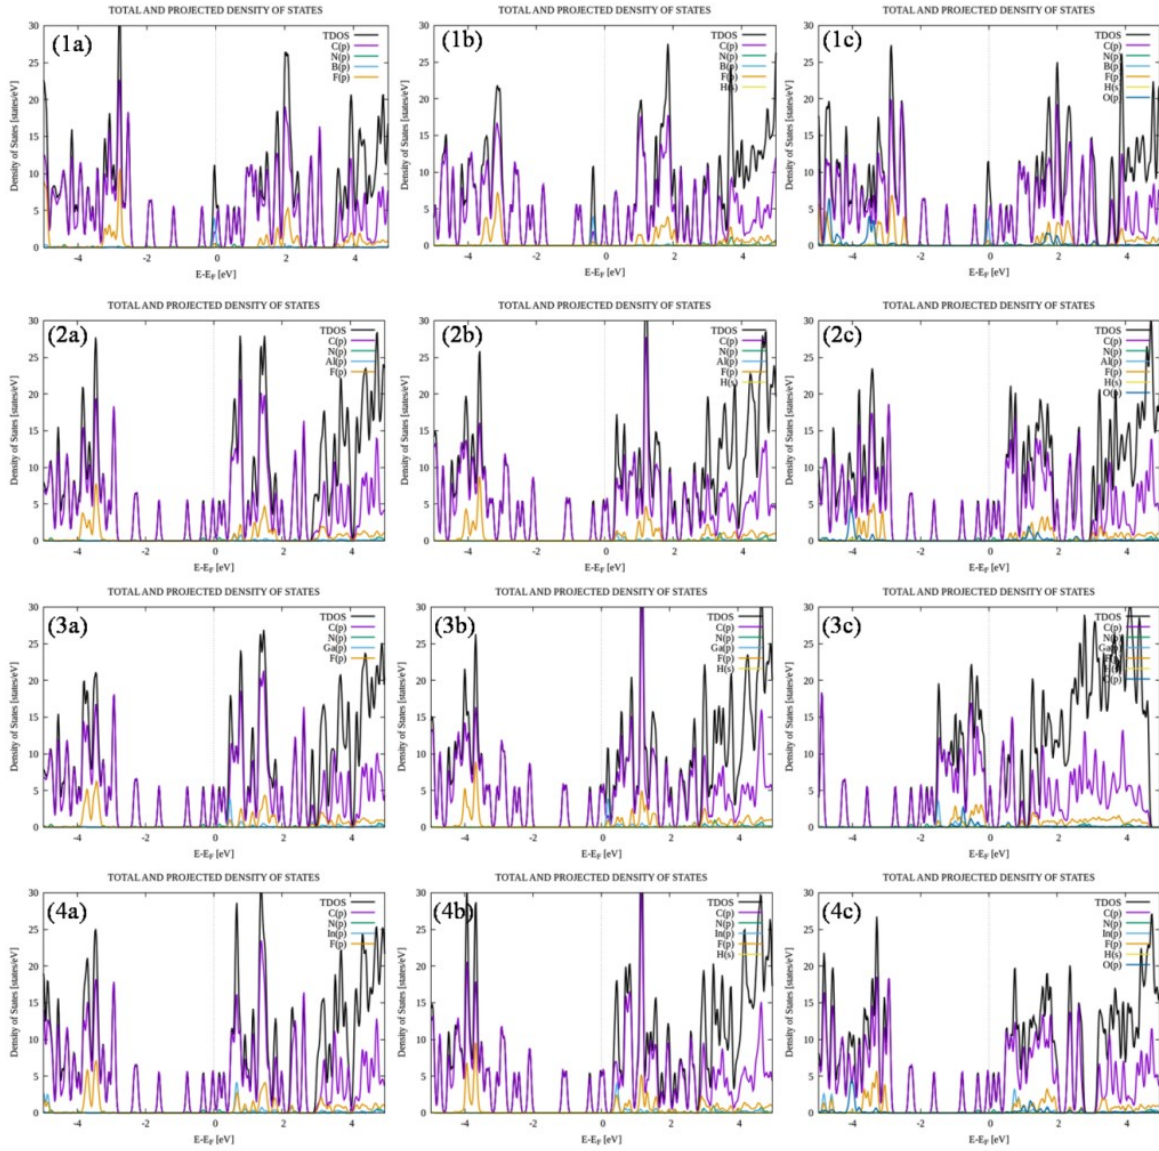

Supplementary Figure 2. Total and partial density of states of N-doped FLPs

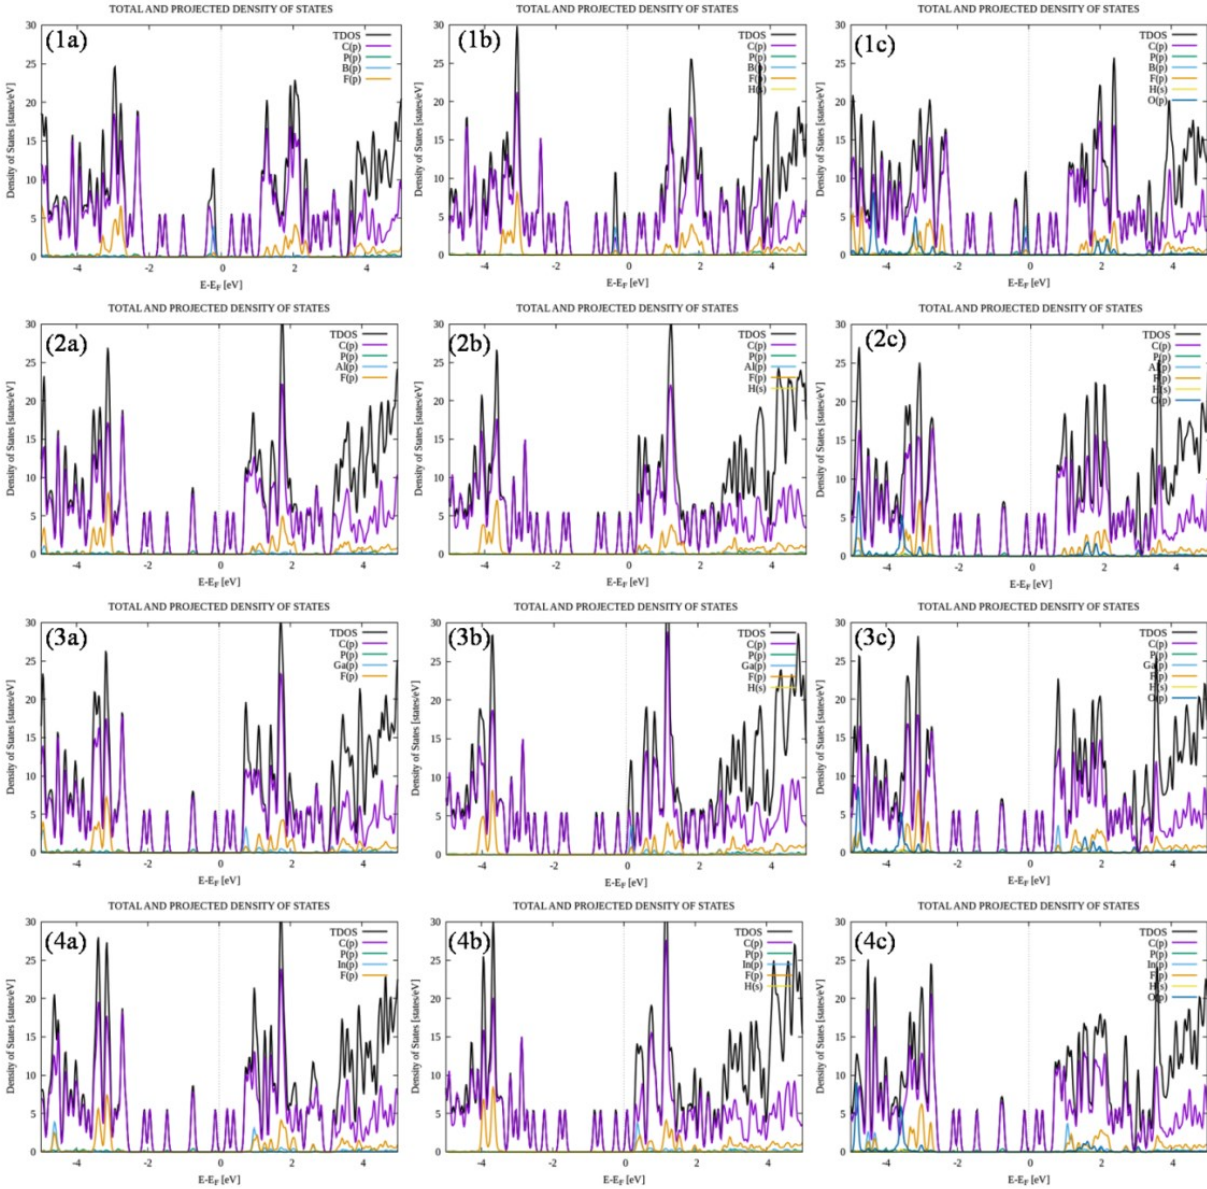

Supplementary Figure 3. Total and partial density of states of P-doped FLPs

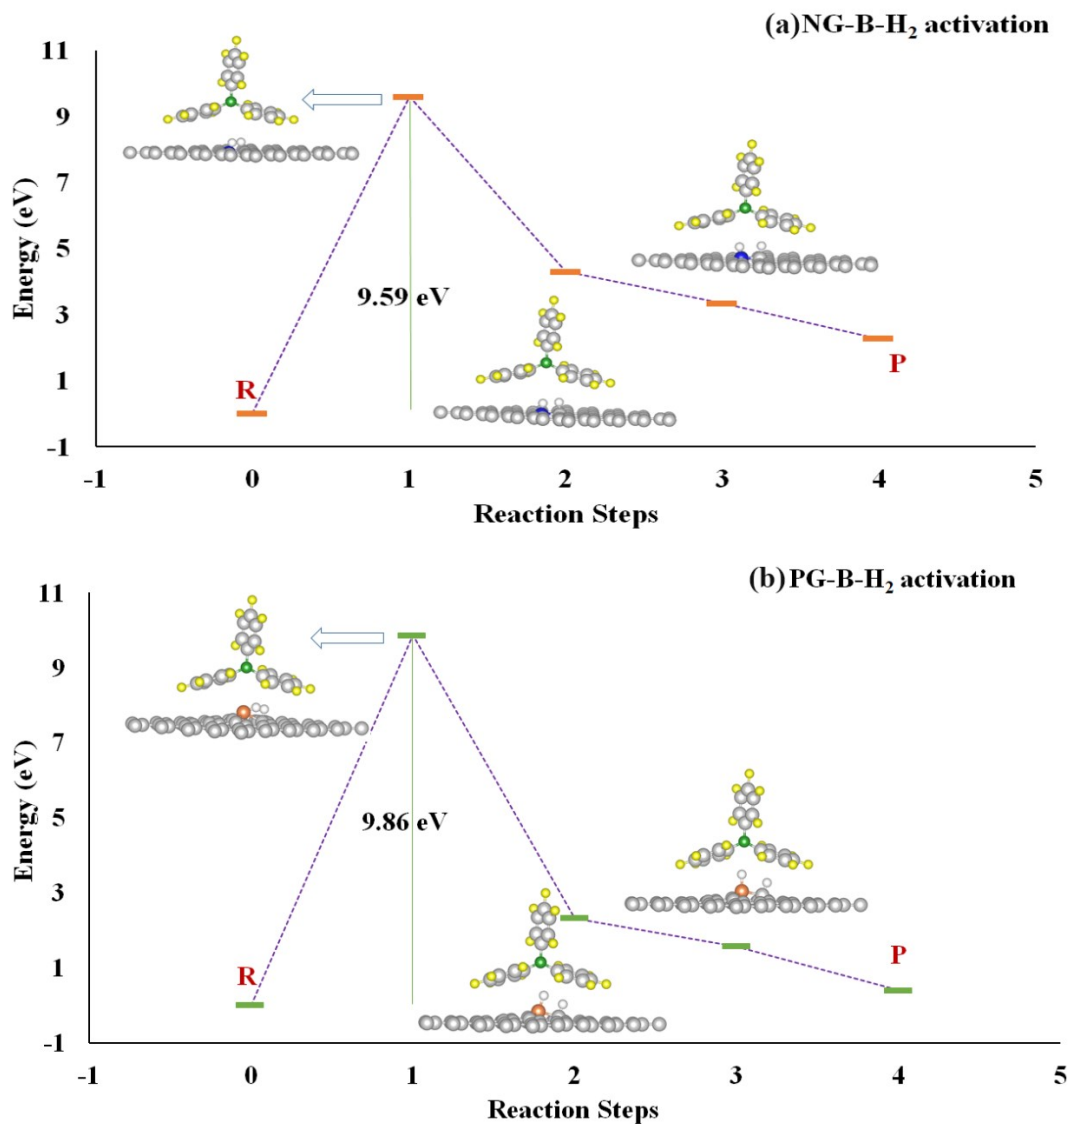

Supplementary Figure 4. The minimum reaction path of H<sub>2</sub> activation on (a) N-doped (NG-B) and (b) P-doped (PG-B) FLP catalysts.

As case study, the potential of (a) N-doped (NG-B) and (b) P-doped (PG-B) FLP catalysts for the H<sub>2</sub> activation has been discussed in Supplementary Figure 4. Along the reaction steps, reactant (R) at step 0 and product (P) at step 4 represents gaseous hydrogen and dissociative chemisorbed hydrogen in presence of catalyst, respectively. NEB calculation is performed by generating 3 steps in between these reactant and product to confirm the activation energy barrier and pathway of the reduction reaction. Both the catalysts shows a very high activation energy barrier of 9.59 and 9.86 eV at reaction step 1, respectively. Along the reaction steps from 1 to 3, the hydrogen atoms distance gradually increases from 0.78 to 1.82 Å in N-

doped (NG-B), and from 0.73 to 2.24 Å in P-doped (PG-B) FLP catalysts, respectively. Owing to strong interaction between the Lewis pair's centers, which increases the activation barrier for H<sub>2</sub> activation.



## Coordinates of Optimized Structures

### 1. NG-N doped graphene Structure (Lewis base)

C N

|                     |                     |                     |
|---------------------|---------------------|---------------------|
| 1.0000000000000000  |                     |                     |
| 13.0000000000000000 | 0.0000000000000000  | 0.0000000000000000  |
| 6.4992140000000000  | 11.2587840000000000 | 0.0000000000000000  |
| -0.9280290000000000 | -0.5634710000000000 | 19.8624500000000000 |

49 1

Direct

|                    |                    |                    |
|--------------------|--------------------|--------------------|
| 0.9048200000000000 | 0.9206010000000000 | 0.2340680000000000 |
| 0.8413530000000000 | 0.8570990000000000 | 0.2341270000000000 |
| 0.9049150000000000 | 0.7300890000000000 | 0.2341450000000000 |
| 0.8414340000000000 | 0.6665800000000000 | 0.2342330000000000 |
| 0.9048590000000000 | 0.5395770000000000 | 0.2341450000000000 |
| 0.8413540000000000 | 0.4760890000000000 | 0.2343550000000000 |
| 0.9047370000000000 | 0.3490600000000000 | 0.2340840000000000 |
| 0.8412300000000000 | 0.2855240000000000 | 0.2341210000000000 |
| 0.9046920000000000 | 0.1585140000000000 | 0.2339780000000000 |
| 0.8412160000000000 | 0.0949780000000000 | 0.2340580000000000 |
| 0.7143470000000000 | 0.9206220000000000 | 0.2340820000000000 |
| 0.6508530000000000 | 0.8571160000000000 | 0.2340990000000000 |
| 0.7144310000000000 | 0.7301140000000000 | 0.2342110000000000 |
| 0.6509490000000000 | 0.6666250000000000 | 0.2344510000000000 |
| 0.7143430000000000 | 0.5396220000000000 | 0.2345520000000000 |
| 0.7142960000000000 | 0.3490870000000000 | 0.2343300000000000 |
| 0.6508810000000000 | 0.4761190000000000 | 0.2346400000000000 |
| 0.6508320000000000 | 0.2855530000000000 | 0.2343370000000000 |
| 0.7142590000000000 | 0.1585330000000000 | 0.2341380000000000 |
| 0.6507410000000000 | 0.0950010000000000 | 0.2340790000000000 |
| 0.5238180000000000 | 0.9205940000000000 | 0.2339350000000000 |
| 0.4602890000000000 | 0.8570900000000000 | 0.2339010000000000 |
| 0.5239320000000000 | 0.7301080000000000 | 0.2342180000000000 |
| 0.4604680000000000 | 0.6665980000000000 | 0.2344430000000000 |
| 0.5238790000000000 | 0.5395870000000000 | 0.2346020000000000 |
| 0.5238280000000000 | 0.3490270000000000 | 0.2342730000000000 |
| 0.4602590000000000 | 0.2854940000000000 | 0.2340640000000000 |
| 0.5237430000000000 | 0.1584940000000000 | 0.2339820000000000 |
| 0.4602030000000000 | 0.0949680000000000 | 0.2337980000000000 |
| 0.3332890000000000 | 0.9205450000000000 | 0.2338030000000000 |

|                    |                    |                    |
|--------------------|--------------------|--------------------|
| 0.2697690000000000 | 0.8570540000000000 | 0.2338240000000000 |
| 0.3334410000000000 | 0.7300740000000000 | 0.2341330000000000 |
| 0.2699930000000000 | 0.6665330000000000 | 0.2342250000000000 |
| 0.3334370000000000 | 0.5395360000000000 | 0.2342210000000000 |
| 0.2698830000000000 | 0.4760120000000000 | 0.2340810000000000 |
| 0.3332800000000000 | 0.3490040000000000 | 0.2339740000000000 |
| 0.2697230000000000 | 0.2854690000000000 | 0.2337690000000000 |
| 0.3332370000000000 | 0.1584450000000000 | 0.2337720000000000 |
| 0.2697030000000000 | 0.0949380000000000 | 0.2337110000000000 |
| 0.1428100000000000 | 0.9205760000000000 | 0.2338760000000000 |
| 0.0793780000000000 | 0.8570540000000000 | 0.2340550000000000 |
| 0.1429800000000000 | 0.7300580000000000 | 0.2341320000000000 |
| 0.0795040000000000 | 0.6665430000000000 | 0.2341970000000000 |
| 0.1429220000000000 | 0.5395350000000000 | 0.2340600000000000 |
| 0.0793740000000000 | 0.4760150000000000 | 0.2339410000000000 |
| 0.1427870000000000 | 0.3489780000000000 | 0.2338260000000000 |
| 0.0792370000000000 | 0.2854790000000000 | 0.2337920000000000 |
| 0.1427460000000000 | 0.1584520000000000 | 0.2337660000000000 |
| 0.0792190000000000 | 0.0949630000000000 | 0.2337820000000000 |
| 0.4604350000000000 | 0.4760460000000000 | 0.2344700000000000 |

## 2. Boron doped Lewis acid Structure

C B F

|                     |                     |                    |
|---------------------|---------------------|--------------------|
| 1.0000000000000000  |                     |                    |
| 13.1676850000000000 | 0.0000000000000000  | 0.0000000000000000 |
| 0.0000000000000000  | 11.5046420000000000 | 0.0000000000000000 |
| 0.0000000000000000  | 0.0000000000000000  | 7.4067110000000000 |

18 1 15

Direct

|                    |                    |                    |
|--------------------|--------------------|--------------------|
| 0.4373450000000000 | 0.6228160000000000 | 0.4713080000000000 |
| 0.4059570000000000 | 0.6559420000000000 | 0.2989110000000000 |
| 0.3530400000000000 | 0.7597870000000000 | 0.2746080000000000 |
| 0.3313960000000000 | 0.8305060000000000 | 0.4227580000000000 |
| 0.3627460000000000 | 0.7973540000000000 | 0.5951280000000000 |
| 0.4157540000000000 | 0.6935270000000000 | 0.6193900000000000 |
| 0.6253050000000000 | 0.4999960000000000 | 0.5000120000000000 |
| 0.6782760000000000 | 0.4999350000000000 | 0.3369300000000000 |
| 0.7842320000000000 | 0.4999000000000000 | 0.3369440000000000 |
| 0.8371950000000000 | 0.4999870000000000 | 0.5000260000000000 |

|                    |                    |                    |
|--------------------|--------------------|--------------------|
| 0.7842020000000000 | 0.5000920000000000 | 0.6631880000000000 |
| 0.6782760000000000 | 0.5000480000000000 | 0.6631480000000000 |
| 0.4373450000000000 | 0.3771670000000000 | 0.5287160000000000 |
| 0.4144440000000000 | 0.3073000000000000 | 0.3802420000000000 |
| 0.3614470000000000 | 0.2034980000000000 | 0.4044500000000000 |
| 0.3314040000000000 | 0.1694770000000000 | 0.5772260000000000 |
| 0.3543390000000000 | 0.2393190000000000 | 0.7256590000000000 |
| 0.4072860000000000 | 0.3431900000000000 | 0.7013970000000000 |
| 0.4999980000000000 | 0.4999960000000000 | 0.5000120000000000 |
| 0.4461010000000000 | 0.6614790000000000 | 0.7862250000000000 |
| 0.3418310000000000 | 0.8657530000000000 | 0.7384850000000000 |
| 0.2801650000000000 | 0.9310050000000000 | 0.3991980000000000 |
| 0.3227160000000000 | 0.7918780000000000 | 0.1077870000000000 |
| 0.4269410000000000 | 0.5875260000000000 | 0.1556080000000000 |
| 0.6270370000000000 | 0.4998660000000000 | 0.1790600000000000 |
| 0.8354710000000000 | 0.4997960000000000 | 0.1790730000000000 |
| 0.9397190000000000 | 0.5000310000000000 | 0.5001070000000000 |
| 0.8354630000000000 | 0.5002130000000000 | 0.8210320000000000 |
| 0.6269830000000000 | 0.5001870000000000 | 0.8209640000000000 |
| 0.4434810000000000 | 0.3402610000000000 | 0.2130970000000000 |
| 0.3392260000000000 | 0.1359170000000000 | 0.2607830000000000 |
| 0.2801190000000000 | 0.0689960000000000 | 0.6006240000000000 |
| 0.3252980000000000 | 0.2064280000000000 | 0.8928320000000000 |
| 0.4294620000000000 | 0.4107710000000000 | 0.8450910000000000 |

### 3. NG-B FLP Structure

C N B F

|                     |                     |                     |
|---------------------|---------------------|---------------------|
| 1.0000000000000000  |                     |                     |
| 12.3813999999999000 | 0.0000000000000000  | 0.0000000000000000  |
| 6.1912510000000000  | 10.7252910000000000 | 0.0000000000000000  |
| -1.1663289999999900 | -0.7081590000000000 | 24.9627359999999000 |

67 1 1 15

Direct

|                    |                    |                    |
|--------------------|--------------------|--------------------|
| 0.0840058199965946 | 0.0981079442163384 | 0.1732331554847780 |
| 0.1507323529264800 | 0.1648396225780040 | 0.1731264593167220 |
| 0.2843542383505670 | 0.0980510784898810 | 0.1730750625371550 |
| 0.3509294820500600 | 0.1645544898515610 | 0.1729390208274570 |
| 0.4841785358244660 | 0.0982816649383197 | 0.1730642921734370 |
| 0.5510346168308580 | 0.1651505934237090 | 0.1732889294610390 |
| 0.6841144957042800 | 0.0982006687783361 | 0.1732667251196600 |

|                    |                    |                    |
|--------------------|--------------------|--------------------|
| 0.7501556550282490 | 0.1651521687452450 | 0.1733478768525850 |
| 0.8838992863584640 | 0.0983453909902252 | 0.1732934060457960 |
| 0.9507501451383280 | 0.1645897464266310 | 0.1732818022976720 |
| 0.8836243070313700 | 0.2984246206624010 | 0.1730345560607720 |
| 0.7512375591581370 | 0.3645097230652410 | 0.1730794505929680 |
| 0.6831999236768720 | 0.2990010436569950 | 0.1732196825007350 |
| 0.5505913972235860 | 0.3652076284586440 | 0.1733914035967680 |
| 0.4841964968591240 | 0.2990236202049420 | 0.1731718172750290 |
| 0.3504765050647690 | 0.3645803777870330 | 0.1728726937373720 |
| 0.2843006320551140 | 0.2984357263220470 | 0.1726869149513430 |
| 0.1503730282073880 | 0.3651008193686890 | 0.1726368724862440 |
| 0.0839359698342611 | 0.2984456942441510 | 0.1728509758471890 |
| 0.0841253473074664 | 0.4983276352794410 | 0.1725811417814070 |
| 0.1510180512931730 | 0.5650988929453180 | 0.1727826065209580 |
| 0.2849090987557340 | 0.4982743983785990 | 0.1729124113355950 |
| 0.3511551740294740 | 0.5646268474326390 | 0.1733346104520100 |
| 0.5504437241405810 | 0.5644471714960500 | 0.1732299021531760 |
| 0.6830448115540530 | 0.4981483404413080 | 0.1728853014346230 |
| 0.7500470379603650 | 0.5649864152915390 | 0.1725264580858220 |
| 0.9507329090259100 | 0.3650827009405200 | 0.1728121809998620 |
| 0.8838371998330830 | 0.4982645906635720 | 0.1725438458346910 |
| 0.9506103192826560 | 0.5649977879758850 | 0.1726466558646880 |
| 0.0840974634684333 | 0.6981979409022080 | 0.1730857097666500 |
| 0.1511101553922670 | 0.7642143057528810 | 0.1733529389235090 |
| 0.2849783390174000 | 0.6972457175675740 | 0.1733020640218270 |
| 0.3505234479810600 | 0.7653114066243510 | 0.1733976189854270 |
| 0.4841840309586370 | 0.6970517108703130 | 0.1730982067480230 |
| 0.5510172540931970 | 0.7640259810338460 | 0.1729035861308230 |
| 0.6841161153677850 | 0.6980741608656830 | 0.1726057300865300 |
| 0.7508301558738710 | 0.7648949247302990 | 0.1727130612633620 |
| 0.8839898809130200 | 0.6984049148287390 | 0.1728446982705450 |
| 0.9505451684210410 | 0.7649580079497060 | 0.1731701309881140 |
| 0.9507167961489440 | 0.9647972700523230 | 0.1734297618058020 |
| 0.8840337198099210 | 0.8981202553449170 | 0.1732515896671290 |
| 0.7508514309538760 | 0.9646513966255540 | 0.1732533078824220 |
| 0.6843373189086170 | 0.8980598854232130 | 0.1729439343179990 |
| 0.5508860813499490 | 0.9647216199380710 | 0.1730458057721970 |
| 0.4842538707863370 | 0.8978583510422110 | 0.1730530250850960 |
| 0.3510251988251070 | 0.9648599462963070 | 0.1733209647322200 |
| 0.2844064340439260 | 0.8977098348367800 | 0.1733093833868610 |
| 0.1505106260973230 | 0.9648962904376740 | 0.1734229722759480 |
| 0.0842894073423398 | 0.8979794069391730 | 0.1733405712095070 |
| 0.4162581875014260 | 0.4711816535262850 | 0.3384519834578920 |

|                    |                    |                    |
|--------------------|--------------------|--------------------|
| 0.4792450840802700 | 0.3405841493334620 | 0.3365770000554770 |
| 0.4206839243223950 | 0.2718626185973960 | 0.3219934264882210 |
| 0.2924561883931270 | 0.3347398887324650 | 0.3104505047463240 |
| 0.2265925844703780 | 0.4649888009061060 | 0.3104168242404390 |
| 0.2899317377033620 | 0.5303281485603010 | 0.3227959122821360 |
| 0.6686303277586470 | 0.5455932399705840 | 0.3213305416445270 |
| 0.5444712493113700 | 0.6083957939188620 | 0.3373076717491730 |
| 0.4834895637770450 | 0.7387967476693160 | 0.3369281917821090 |
| 0.5410101313061380 | 0.8050200339049170 | 0.3227391656475800 |
| 0.6673839237300040 | 0.7391186379429070 | 0.3104973290231310 |
| 0.7314068941626600 | 0.6087786533258060 | 0.3096487092012930 |
| 0.4843999817341380 | 0.5538758324690460 | 0.4291272984108970 |
| 0.3791351790355960 | 0.6330590787849810 | 0.4589123239673670 |
| 0.3849044299548180 | 0.6488875096430060 | 0.5144215366926870 |
| 0.4983552552363930 | 0.5796783563486890 | 0.5422917854405010 |
| 0.6048645430396430 | 0.4975259054304980 | 0.5140878102744490 |
| 0.5964650529260660 | 0.4876143395388030 | 0.4584296318762930 |
| 0.4841089388148920 | 0.4981224584741890 | 0.1734378189378430 |
| 0.4808514670752380 | 0.5433334303899950 | 0.3656244879771110 |
| 0.2670597185090500 | 0.7009029723748490 | 0.4333263465266260 |
| 0.2824996712844120 | 0.7305582386389370 | 0.5413769720224910 |
| 0.5043730288768010 | 0.5918884143480790 | 0.5959445353035170 |
| 0.7142461643831960 | 0.4288138617208060 | 0.5406097905692730 |
| 0.7022669232133760 | 0.4079832270451950 | 0.4323607809077440 |
| 0.6032169670160720 | 0.2759657469703870 | 0.3493113074384140 |
| 0.4863044522958100 | 0.1462332062182160 | 0.3191144098147010 |
| 0.2337553228490380 | 0.2695969609546990 | 0.2983537978121820 |
| 0.1034230600217310 | 0.5264160850340600 | 0.2978607802892970 |
| 0.2236642364515860 | 0.6564667698273000 | 0.3198827054328880 |
| 0.3619465692627370 | 0.8049171333426530 | 0.3509339820176850 |
| 0.4761776341058990 | 0.9303975066677810 | 0.3205227005051230 |
| 0.7266430932270470 | 0.8006210865861190 | 0.2982026618849000 |
| 0.8529775791043650 | 0.5452591870544900 | 0.2971560413760640 |
| 0.7333749188106780 | 0.4191555946337190 | 0.3184469612561150 |

#### 4. NG-B-H2 FLP Structure

N C F B H

|                     |                     |                     |
|---------------------|---------------------|---------------------|
| 1.0000000000000000  |                     |                     |
| 12.3814000000000000 | 0.0000000000000000  | 0.0000000000000000  |
| 6.1912510000000000  | 10.7252910000000000 | 0.0000000000000000  |
| -1.1663290000000000 | -0.7081590000000000 | 24.9627360000000000 |

1 67 15 1 2

Direct

|                    |                    |                    |
|--------------------|--------------------|--------------------|
| 0.4841520000000000 | 0.4981200000000000 | 0.1734320000000000 |
| 0.5506100000000000 | 0.3652080000000000 | 0.1734140000000000 |
| 0.6832360000000000 | 0.2990230000000000 | 0.1732720000000000 |
| 0.7513000000000000 | 0.3645250000000000 | 0.1731220000000000 |
| 0.6831000000000000 | 0.4981810000000000 | 0.1728760000000000 |
| 0.5505020000000000 | 0.5644390000000000 | 0.1732120000000000 |
| 0.7501620000000000 | 0.1651650000000000 | 0.1733840000000000 |
| 0.8839110000000000 | 0.0983400000000000 | 0.1733220000000000 |
| 0.9507870000000000 | 0.1645850000000000 | 0.1733420000000000 |
| 0.8836730000000000 | 0.2984210000000000 | 0.1730760000000000 |
| 0.4842240000000000 | 0.2989990000000000 | 0.1731680000000000 |
| 0.5510410000000000 | 0.1651450000000000 | 0.1732950000000000 |
| 0.6841250000000000 | 0.0982070000000000 | 0.1732770000000000 |
| 0.3504970000000000 | 0.3645710000000000 | 0.1728730000000000 |
| 0.2843520000000000 | 0.2983980000000000 | 0.1727040000000000 |
| 0.3509910000000000 | 0.1645270000000000 | 0.1729490000000000 |
| 0.4842240000000000 | 0.0982760000000000 | 0.1730650000000000 |
| 0.1504300000000000 | 0.3650820000000000 | 0.1726520000000000 |
| 0.0839910000000000 | 0.2984350000000000 | 0.1728960000000000 |
| 0.1507690000000000 | 0.1648300000000000 | 0.1731780000000000 |
| 0.2843940000000000 | 0.0980310000000000 | 0.1731030000000000 |
| 0.7501090000000000 | 0.5649880000000000 | 0.1725090000000000 |
| 0.8838750000000000 | 0.4982220000000000 | 0.1725380000000000 |
| 0.9507790000000000 | 0.3650510000000000 | 0.1728340000000000 |
| 0.3511920000000000 | 0.5646280000000000 | 0.1733280000000000 |
| 0.2849490000000000 | 0.4982720000000000 | 0.1729010000000000 |
| 0.1510550000000000 | 0.5651280000000000 | 0.1727600000000000 |
| 0.0841950000000000 | 0.4982950000000000 | 0.1725650000000000 |
| 0.2850190000000000 | 0.6972410000000000 | 0.1732910000000000 |
| 0.1511710000000000 | 0.7642250000000000 | 0.1733380000000000 |
| 0.0841570000000000 | 0.6982170000000000 | 0.1730450000000000 |
| 0.4842430000000000 | 0.6970490000000000 | 0.1730680000000000 |
| 0.3505690000000000 | 0.7652850000000000 | 0.1733880000000000 |
| 0.5510830000000000 | 0.7640340000000000 | 0.1728490000000000 |
| 0.6841690000000000 | 0.6981060000000000 | 0.1725640000000000 |
| 0.7509040000000000 | 0.7648980000000000 | 0.1726810000000000 |
| 0.8840790000000000 | 0.6983410000000000 | 0.1727920000000000 |
| 0.9506780000000000 | 0.5649260000000000 | 0.1726350000000000 |
| 0.2844600000000000 | 0.8976760000000000 | 0.1733230000000000 |

|                    |                    |                    |
|--------------------|--------------------|--------------------|
| 0.1505700000000000 | 0.9648780000000000 | 0.1734590000000000 |
| 0.0843320000000000 | 0.8979680000000000 | 0.1733530000000000 |
| 0.3510550000000000 | 0.9648470000000000 | 0.1733160000000000 |
| 0.4842930000000000 | 0.8978520000000000 | 0.1730380000000000 |
| 0.5509200000000000 | 0.9647170000000000 | 0.1730550000000000 |
| 0.6843550000000000 | 0.8980710000000000 | 0.1729210000000000 |
| 0.7508580000000000 | 0.9646580000000000 | 0.1732430000000000 |
| 0.8840570000000000 | 0.8981100000000000 | 0.1732300000000000 |
| 0.9506040000000000 | 0.7649350000000000 | 0.1731140000000000 |
| 0.0840420000000000 | 0.0980930000000000 | 0.1732700000000000 |
| 0.9507380000000000 | 0.9647940000000000 | 0.1734400000000000 |
| 0.2267410000000000 | 0.4648960000000000 | 0.3103770000000000 |
| 0.2926810000000000 | 0.3346680000000000 | 0.3105120000000000 |
| 0.4209440000000000 | 0.2718670000000000 | 0.3221370000000000 |
| 0.4792930000000000 | 0.3407690000000000 | 0.3368820000000000 |
| 0.4161510000000000 | 0.4713610000000000 | 0.3384090000000000 |
| 0.2899770000000000 | 0.5303560000000000 | 0.3226880000000000 |
| 0.4845170000000000 | 0.5536810000000000 | 0.4290510000000000 |
| 0.3791300000000000 | 0.6326060000000000 | 0.4588290000000000 |
| 0.3843680000000000 | 0.6483680000000000 | 0.5143200000000000 |
| 0.4978240000000000 | 0.5796500000000000 | 0.5422220000000000 |
| 0.6045440000000000 | 0.4976780000000000 | 0.5140170000000000 |
| 0.5965880000000000 | 0.4876130000000000 | 0.4583660000000000 |
| 0.5445010000000000 | 0.6084010000000000 | 0.3372970000000000 |
| 0.6686440000000000 | 0.5456010000000000 | 0.3213370000000000 |
| 0.7314390000000000 | 0.6087670000000000 | 0.3096530000000000 |
| 0.6673890000000000 | 0.7391000000000000 | 0.3104940000000000 |
| 0.5410140000000000 | 0.8050060000000000 | 0.3227460000000000 |
| 0.4834820000000000 | 0.7387920000000000 | 0.3369140000000000 |
| 0.1035320000000000 | 0.5263460000000000 | 0.2978530000000000 |
| 0.6030290000000000 | 0.2768470000000000 | 0.3501920000000000 |
| 0.4863610000000000 | 0.1462680000000000 | 0.3191530000000000 |
| 0.2339100000000000 | 0.2695830000000000 | 0.2983650000000000 |
| 0.2236360000000000 | 0.6564880000000000 | 0.3198570000000000 |
| 0.2670880000000000 | 0.7008160000000000 | 0.4333210000000000 |
| 0.2811760000000000 | 0.7296940000000000 | 0.5408670000000000 |
| 0.5038120000000000 | 0.5924710000000000 | 0.5958900000000000 |
| 0.7139180000000000 | 0.4293130000000000 | 0.5405580000000000 |
| 0.7026060000000000 | 0.4082420000000000 | 0.4322440000000000 |
| 0.7333670000000000 | 0.4191500000000000 | 0.3184500000000000 |
| 0.3619660000000000 | 0.8048990000000000 | 0.3509320000000000 |

|                    |                    |                    |
|--------------------|--------------------|--------------------|
| 0.4761960000000000 | 0.9303730000000000 | 0.3205170000000000 |
| 0.7266740000000000 | 0.8006060000000000 | 0.2982200000000000 |
| 0.8529870000000000 | 0.5452370000000000 | 0.2971570000000000 |
| 0.4808290000000000 | 0.5434320000000000 | 0.3655420000000000 |
| 0.5366230000000000 | 0.5508800000000000 | 0.2145150000000000 |
| 0.5029360000000000 | 0.5151320000000000 | 0.2115580000000000 |

## 5. NG-B-H2 dissociated FLP Structure

N C F B H

|                     |                     |                    |
|---------------------|---------------------|--------------------|
| 1.0000000000000000  |                     |                    |
| 12.381399999999900  | 0.0000000000000000  | 0.0000000000000000 |
| 6.1912510000000000  | 10.7252910000000000 | 0.0000000000000000 |
| -1.1663289999999900 | -0.7081590000000000 | 24.962735999999900 |

N C F B H

1 67 15 1 2

Direct

|                    |                    |                    |
|--------------------|--------------------|--------------------|
| 0.4815187032594480 | 0.4962999979116060 | 0.1933992482701800 |
| 0.5523307912237060 | 0.3611723247461940 | 0.1750350025746570 |
| 0.6833259816496520 | 0.2989157644261300 | 0.1733190008800950 |
| 0.7512694403823010 | 0.3656322459811040 | 0.1733611516796910 |
| 0.6871393998595370 | 0.4966666789352850 | 0.1757589797693380 |
| 0.5551980986591570 | 0.5696997144192290 | 0.1949504834795560 |
| 0.7502659823217310 | 0.1651361882088240 | 0.1705495873238420 |
| 0.8839743890791930 | 0.0982005304594904 | 0.1701904144504190 |
| 0.9507184034300290 | 0.1646644847318510 | 0.1700313538846150 |
| 0.8840780917456410 | 0.2981202842055540 | 0.1701731282428720 |
| 0.4838156039212980 | 0.2983478792329110 | 0.1727684116364440 |
| 0.5507021131477230 | 0.1646095014234030 | 0.1702073215782290 |
| 0.6838673569139140 | 0.0981583519717507 | 0.1701735870611150 |
| 0.3500831476335490 | 0.3645551365255520 | 0.1732448504968910 |
| 0.2838332032534240 | 0.2982595901518090 | 0.1707322446917260 |
| 0.3504754631799320 | 0.1647159088640390 | 0.1701884609900070 |
| 0.4837617044317670 | 0.0982377331464110 | 0.1700462722772140 |
| 0.1501858718600760 | 0.3646748312684160 | 0.1688395171388860 |
| 0.0840121314819466 | 0.2979314527115130 | 0.1688572513718010 |
| 0.1505833694520620 | 0.1649381035176080 | 0.1698285255418980 |
| 0.2837007149901900 | 0.0985129898161459 | 0.1700386777334890 |
| 0.7505881610972370 | 0.5642639911195900 | 0.1714915496657720 |
| 0.8838969087348350 | 0.4977456031691180 | 0.1683543518705660 |



|                    |                    |                    |
|--------------------|--------------------|--------------------|
| 0.9505833119609240 | 0.3646550373516440 | 0.1687832584579460 |
| 0.3466376710287670 | 0.5667315273297330 | 0.1746747477220670 |
| 0.2837994506888110 | 0.4981570934040870 | 0.1719496915071520 |
| 0.1500322406746180 | 0.5649109269863970 | 0.1685893878355520 |
| 0.0836068344024897 | 0.4978505085905930 | 0.1678884865828440 |
| 0.2844702290826720 | 0.6977120444272880 | 0.1731720526988250 |
| 0.1507243559802240 | 0.7645829529592380 | 0.1701637652569580 |
| 0.0836986837432633 | 0.6980837561491430 | 0.1688648117949210 |
| 0.4822065554231780 | 0.7017911920304750 | 0.1761628619819830 |
| 0.3512235719882420 | 0.7657873168694800 | 0.1736959658888160 |
| 0.5499569283523170 | 0.7652868041829000 | 0.1725032607864160 |
| 0.6842186222061860 | 0.6985725115334740 | 0.1724133557424770 |
| 0.7502790568487370 | 0.7645762144471560 | 0.1701946980255800 |
| 0.8839274471614020 | 0.6979797935457500 | 0.1687377511167730 |
| 0.9503153098336410 | 0.5646923288648330 | 0.1677804608804660 |
| 0.2837137090572490 | 0.8986331574169930 | 0.1707712987351810 |
| 0.1502847233882650 | 0.9651252413098960 | 0.1701822671372730 |
| 0.0838482831622024 | 0.8983024845560800 | 0.1701138907323750 |
| 0.3504005791698590 | 0.9651725534386030 | 0.1702075568774500 |
| 0.4835785540784630 | 0.8985833827506590 | 0.1702097822297040 |
| 0.5506098565316840 | 0.9649558026003620 | 0.1699562260911460 |
| 0.6838510966747110 | 0.8983562004306530 | 0.1700798571416440 |
| 0.7506008697635480 | 0.9646608937136040 | 0.1700235861175260 |
| 0.8838360274477950 | 0.8981248692978120 | 0.1699089180949150 |
| 0.9501953372864780 | 0.7648033966570460 | 0.1689290662621160 |
| 0.0838633865418378 | 0.0982292892824651 | 0.1699902041824030 |
| 0.9505473848139830 | 0.9648661917325440 | 0.1700267006992990 |
| 0.2270123231070750 | 0.4655192508348730 | 0.3105384665688760 |
| 0.2930064227039650 | 0.3351765191033470 | 0.3106356939572720 |
| 0.4212484512453810 | 0.2720040545089260 | 0.3224152600680050 |
| 0.4799216265451890 | 0.3405437331113930 | 0.3371643988109440 |
| 0.4170722719210490 | 0.4714106004600580 | 0.3382417827416590 |
| 0.2905065397910590 | 0.5307746005682760 | 0.3226138810548600 |
| 0.4843589864467580 | 0.5523101975572480 | 0.4296256468620660 |
| 0.3787351203572380 | 0.6313203778801560 | 0.4591560488077210 |
| 0.3839575066755190 | 0.6471210114303630 | 0.5145935106839520 |
| 0.4974581780100490 | 0.5785597790242280 | 0.5425074753416920 |
| 0.6044956918090110 | 0.4967604881767450 | 0.5144344454570980 |
| 0.5966092707615570 | 0.4867389535821780 | 0.4588095611923130 |
| 0.5459978147363090 | 0.6081293227090330 | 0.3392033776886830 |
| 0.6711621746223670 | 0.5452758393372490 | 0.3244738414567620 |

|                    |                    |                    |
|--------------------|--------------------|--------------------|
| 0.7330561863539940 | 0.6082576840035840 | 0.3112573005210460 |
| 0.6679426406577180 | 0.7386530367274220 | 0.3110180240058820 |
| 0.5415390115292980 | 0.8045270732523130 | 0.3232934828542740 |
| 0.4840263135109080 | 0.7385664989839070 | 0.3377925096617210 |
| 0.1039941954936220 | 0.5265764849923940 | 0.2980132099631700 |
| 0.6032906979372320 | 0.2765806285647490 | 0.3510299157615220 |
| 0.4862562518851300 | 0.1465013955650580 | 0.3193084477982160 |
| 0.2341689292052530 | 0.2703907510666240 | 0.2984795578489490 |
| 0.2246887763246040 | 0.6568895221172600 | 0.3199069659528300 |
| 0.2670918850918360 | 0.7005610808297860 | 0.4334301288657990 |
| 0.2810848612230990 | 0.7296688128619540 | 0.5409449328193230 |
| 0.5037169675362670 | 0.5923026901256550 | 0.5960444720888420 |
| 0.7139920561048710 | 0.4288012891762380 | 0.5409484680509350 |
| 0.7025848476501350 | 0.4082288458021170 | 0.4325190168518610 |
| 0.7357608658611870 | 0.4186639870685760 | 0.3223532678281410 |
| 0.3620255802145560 | 0.8047677673713240 | 0.3509346983122070 |
| 0.4766929314871540 | 0.9296418599007140 | 0.3206585302767350 |
| 0.7261798719668230 | 0.8004653327639760 | 0.2981054105637040 |
| 0.8534460582845800 | 0.5451349536539120 | 0.2973571672276350 |
| 0.4814952112598530 | 0.5428094971803360 | 0.3664481970265030 |
| 0.5643264143717030 | 0.5793521928654230 | 0.2390227424929520 |
| 0.4736159583177100 | 0.4893411280401460 | 0.2341088793466940 |

## 6. NG-B-dissociated H2- CO2 FLP Structure

C B F O N H

|                     |                     |                     |
|---------------------|---------------------|---------------------|
| 1.0000000000000000  |                     |                     |
| 12.3813999999999000 | 0.0000000000000000  | 0.0000000000000000  |
| 6.1912510000000000  | 10.7252910000000000 | 0.0000000000000000  |
| -1.1663289999999900 | -0.7081590000000000 | 24.9627359999999000 |

68 1 15 2 1 2

Direct

|                    |                    |                    |
|--------------------|--------------------|--------------------|
| 0.6751170000000000 | 0.5562630000000000 | 0.3842050000000000 |
| 0.5546630000000000 | 0.6214850000000000 | 0.4043500000000000 |
| 0.4863800000000000 | 0.7487290000000000 | 0.3935830000000000 |
| 0.5306940000000000 | 0.8081200000000000 | 0.3625160000000000 |
| 0.6505500000000000 | 0.7392870000000000 | 0.3421380000000000 |
| 0.7237860000000000 | 0.6126650000000000 | 0.3534200000000000 |
| 0.4897090000000000 | 0.5616080000000000 | 0.4960340000000000 |
| 0.3785570000000000 | 0.6093200000000000 | 0.5241750000000000 |

|                    |                    |                    |
|--------------------|--------------------|--------------------|
| 0.3752700000000000 | 0.6238540000000000 | 0.5797310000000000 |
| 0.4868960000000000 | 0.5824290000000000 | 0.6093420000000000 |
| 0.6001830000000000 | 0.5306230000000000 | 0.5830920000000000 |
| 0.5993660000000000 | 0.5238530000000000 | 0.5273530000000000 |
| 0.4153650000000000 | 0.5022530000000000 | 0.4003680000000000 |
| 0.4734940000000000 | 0.3719130000000000 | 0.3955930000000000 |
| 0.4236240000000000 | 0.3091600000000000 | 0.3651750000000000 |
| 0.3087220000000000 | 0.3785210000000000 | 0.3385030000000000 |
| 0.2454640000000000 | 0.5088630000000000 | 0.3431170000000000 |
| 0.2999450000000000 | 0.5682550000000000 | 0.3731640000000000 |
| 0.5182370000000000 | 0.5320070000000000 | 0.2959560000000000 |
| 0.5617180000000000 | 0.5680290000000000 | 0.1719500000000000 |
| 0.6896270000000000 | 0.4877270000000000 | 0.1485130000000000 |
| 0.7515740000000000 | 0.5551990000000000 | 0.1420390000000000 |
| 0.6834350000000000 | 0.6897010000000000 | 0.1424640000000000 |
| 0.5487390000000000 | 0.7579550000000000 | 0.1421370000000000 |
| 0.4811920000000000 | 0.6960560000000000 | 0.1487040000000000 |
| 0.7490170000000000 | 0.7552770000000000 | 0.1378710000000000 |
| 0.8822930000000000 | 0.6887170000000000 | 0.1355790000000000 |
| 0.9486340000000000 | 0.5556490000000000 | 0.1348830000000000 |
| 0.8834040000000000 | 0.4884370000000000 | 0.1363780000000000 |
| 0.6824310000000000 | 0.8884600000000000 | 0.1353810000000000 |
| 0.7490440000000000 | 0.9545310000000000 | 0.1334520000000000 |
| 0.8820360000000000 | 0.8887700000000000 | 0.1333950000000000 |
| 0.9478990000000000 | 0.7558540000000000 | 0.1339180000000000 |
| 0.4820850000000000 | 0.8897040000000000 | 0.1364470000000000 |
| 0.5491440000000000 | 0.9550740000000000 | 0.1346700000000000 |
| 0.7508440000000000 | 0.3560580000000000 | 0.1420690000000000 |
| 0.8831920000000000 | 0.2887820000000000 | 0.1363820000000000 |
| 0.9497220000000000 | 0.3553390000000000 | 0.1357060000000000 |
| 0.9494630000000000 | 0.1553010000000000 | 0.1339520000000000 |
| 0.8837860000000000 | 0.0875860000000000 | 0.1329440000000000 |
| 0.7513870000000000 | 0.1527310000000000 | 0.1337600000000000 |
| 0.6868980000000000 | 0.2841740000000000 | 0.1396410000000000 |
| 0.6828090000000000 | 0.0871700000000000 | 0.1327970000000000 |
| 0.5493420000000000 | 0.1526090000000000 | 0.1330310000000000 |
| 0.4832200000000000 | 0.2849810000000000 | 0.1370620000000000 |
| 0.5569330000000000 | 0.3424410000000000 | 0.1427880000000000 |
| 0.4820940000000000 | 0.0875110000000000 | 0.1334070000000000 |
| 0.3488070000000000 | 0.1552550000000000 | 0.1344040000000000 |
| 0.2823270000000000 | 0.2886810000000000 | 0.1356070000000000 |

|                    |                    |                    |
|--------------------|--------------------|--------------------|
| 0.3485800000000000 | 0.3551940000000000 | 0.1380470000000000 |
| 0.1487410000000000 | 0.3555120000000000 | 0.1348010000000000 |
| 0.0810800000000000 | 0.4887290000000000 | 0.1339370000000000 |
| 0.1458400000000000 | 0.5563460000000000 | 0.1339450000000000 |
| 0.2782040000000000 | 0.4899570000000000 | 0.1378910000000000 |
| 0.0828370000000000 | 0.2886490000000000 | 0.1348360000000000 |
| 0.1491640000000000 | 0.1557820000000000 | 0.1346860000000000 |
| 0.2820870000000000 | 0.0892380000000000 | 0.1346660000000000 |
| 0.0805350000000000 | 0.6897340000000000 | 0.1336440000000000 |
| 0.1461630000000000 | 0.7581430000000000 | 0.1346050000000000 |
| 0.2775180000000000 | 0.6935860000000000 | 0.1406920000000000 |
| 0.3354980000000000 | 0.5637250000000000 | 0.1440620000000000 |
| 0.3494530000000000 | 0.7574510000000000 | 0.1426270000000000 |
| 0.2823000000000000 | 0.8896310000000000 | 0.1366730000000000 |
| 0.1486040000000000 | 0.9562340000000000 | 0.1342440000000000 |
| 0.0809830000000000 | 0.8905180000000000 | 0.1333400000000000 |
| 0.3488050000000000 | 0.9561600000000000 | 0.1356930000000000 |
| 0.9488450000000000 | 0.9554990000000000 | 0.1325880000000000 |
| 0.0824640000000000 | 0.0891390000000000 | 0.1339300000000000 |
| 0.4874070000000000 | 0.5607320000000000 | 0.4336980000000000 |
| 0.2682210000000000 | 0.6500970000000000 | 0.4971300000000000 |
| 0.2663990000000000 | 0.6778540000000000 | 0.6052260000000000 |
| 0.4849290000000000 | 0.5915850000000000 | 0.6630420000000000 |
| 0.7080700000000000 | 0.4878150000000000 | 0.6115210000000000 |
| 0.7106770000000000 | 0.4731520000000000 | 0.5032630000000000 |
| 0.3690390000000000 | 0.8175900000000000 | 0.4120530000000000 |
| 0.4581400000000000 | 0.9293270000000000 | 0.3508800000000000 |
| 0.6945950000000000 | 0.7942550000000000 | 0.3113080000000000 |
| 0.8387670000000000 | 0.5454430000000000 | 0.3330750000000000 |
| 0.7471210000000000 | 0.4323450000000000 | 0.3920680000000000 |
| 0.1338660000000000 | 0.5762830000000000 | 0.3179350000000000 |
| 0.2609510000000000 | 0.3193600000000000 | 0.3079360000000000 |
| 0.4856040000000000 | 0.1836360000000000 | 0.3602750000000000 |
| 0.5874480000000000 | 0.3016690000000000 | 0.4192970000000000 |
| 0.2364260000000000 | 0.6944070000000000 | 0.3752740000000000 |
| 0.6023290000000000 | 0.4295060000000000 | 0.2999360000000000 |
| 0.4334960000000000 | 0.6337060000000000 | 0.2902630000000000 |
| 0.4798540000000000 | 0.4855460000000000 | 0.1734290000000000 |
| 0.4666140000000000 | 0.4698040000000000 | 0.2149580000000000 |
| 0.5805290000000000 | 0.5865230000000000 | 0.2143690000000000 |

## 7. NG-B-HCOOH FLP Structure

C N O F B H

|                     |                     |                     |
|---------------------|---------------------|---------------------|
| 1.0000000000000000  |                     |                     |
| 12.3813999999999000 | 0.0000000000000000  | 0.0000000000000000  |
| 6.1912510000000000  | 10.7252910000000000 | 0.0000000000000000  |
| -1.1663289999999900 | -0.7081590000000000 | 24.9627359999999000 |

68 1 2 15 1 2

Direct

|                    |                    |                    |
|--------------------|--------------------|--------------------|
| 0.9503838201133160 | 0.7654599003523130 | 0.1575784671355890 |
| 0.8838227482920630 | 0.6988965592641260 | 0.1576763885405350 |
| 0.7506489367709440 | 0.7653854188899480 | 0.1576433926739910 |
| 0.6842129624181610 | 0.8985825983054110 | 0.1577711476651390 |
| 0.7506651272518890 | 0.9652271614281850 | 0.1575958079784340 |
| 0.8838356320836550 | 0.8986486265961680 | 0.1576572066966240 |
| 0.9504144766770470 | 0.5654578697611560 | 0.1567227517299340 |
| 0.8834966779463220 | 0.4987092305434540 | 0.1558987147316060 |
| 0.7496416192401200 | 0.5653990621234490 | 0.1545096880576300 |
| 0.6837804027367460 | 0.6984844331758270 | 0.1558101644511390 |
| 0.6825646056349190 | 0.4984137269759060 | 0.1518059536115480 |
| 0.7507016760837580 | 0.3648025642467410 | 0.1522688642781060 |
| 0.8831130650358290 | 0.2988459445850980 | 0.1545198929292830 |
| 0.9504316955161650 | 0.3655349414484990 | 0.1556103106647710 |
| 0.6825997102283550 | 0.2992592536018770 | 0.1515599189461970 |
| 0.7495794179498100 | 0.1658118745980060 | 0.1542975019929850 |
| 0.8834283712392560 | 0.0989558275276564 | 0.1557949926401100 |
| 0.9504131909360630 | 0.1650829331974350 | 0.1555753410224430 |
| 0.5500077774081300 | 0.3652596597774020 | 0.1496689998853930 |
| 0.4838169484907110 | 0.2991888520394170 | 0.1515641751690100 |
| 0.5507783702748240 | 0.1655865965052590 | 0.1543145738505280 |
| 0.6838461976897870 | 0.0986921280392671 | 0.1555702714382850 |
| 0.3500594986854370 | 0.3647411959297220 | 0.1522278574421820 |
| 0.2840664651885760 | 0.2988146007700910 | 0.1546200190836470 |
| 0.3507814295137830 | 0.1649933383533940 | 0.1556184636361030 |
| 0.4840288170265140 | 0.0987515494152074 | 0.1558406669385350 |
| 0.2844141383470380 | 0.4984990837434540 | 0.1514780294874950 |
| 0.1507441296520090 | 0.5654956358345740 | 0.1542565538932480 |
| 0.0839380416143628 | 0.4987512048762360 | 0.1558213584704000 |
| 0.1502267454071150 | 0.3655300491304030 | 0.1556328044591400 |
| 0.2841677179366930 | 0.0984838699032332 | 0.1561300725327140 |
| 0.1504988195723670 | 0.1652619565890160 | 0.1560481546192800 |

|                    |                    |                    |
|--------------------|--------------------|--------------------|
| 0.0837568813742812 | 0.2988684651632300 | 0.1561369520308660 |
| 0.0838211579924740 | 0.6986082210710450 | 0.1555599810666640 |
| 0.1507585633349690 | 0.7645864251727470 | 0.1542665335560520 |
| 0.2844206470079430 | 0.6975244712521160 | 0.1512999733851070 |
| 0.3504734793747420 | 0.5647569835935470 | 0.1493946675980250 |
| 0.5506235061926380 | 0.7643691326822270 | 0.1545663655525480 |
| 0.4837771612211020 | 0.6972261880117480 | 0.1517200999385160 |
| 0.5499531526029660 | 0.5645845167945170 | 0.1500450585298140 |
| 0.5507093972519350 | 0.9652226364593370 | 0.1568280337393790 |
| 0.4839778934049180 | 0.8982688373023640 | 0.1559172247092210 |
| 0.3507398528696860 | 0.9652519877971650 | 0.1556180715828850 |
| 0.2840086473737670 | 0.8980006503976180 | 0.1544827778516620 |
| 0.3500294783809170 | 0.7656055360292140 | 0.1520666099458510 |
| 0.1501454642731090 | 0.9653327353657390 | 0.1555201293545740 |
| 0.0838976164745819 | 0.8984509715043260 | 0.1558002040185530 |
| 0.0836933005489017 | 0.0985672762839851 | 0.1560539562205000 |
| 0.9503507712198970 | 0.9653681344314000 | 0.1566861257835880 |
| 0.4630773250738000 | 0.5093888379520160 | 0.2628861852133330 |
| 0.6718149548457470 | 0.5404582185692220 | 0.3530225995212240 |
| 0.5521802431967200 | 0.6037392315622040 | 0.3740721896483880 |
| 0.4872030195390090 | 0.7334134112041570 | 0.3697828900934610 |
| 0.5353740609821690 | 0.7986598781504410 | 0.3455239823435320 |
| 0.6561638602392310 | 0.7323346404978360 | 0.3260295507464850 |
| 0.7247292477216200 | 0.6028682464711950 | 0.3297003297640210 |
| 0.4137161412663030 | 0.4790795149962470 | 0.3755428820525860 |
| 0.4781902249850890 | 0.3486983595065920 | 0.3707779566696230 |
| 0.4269107288887250 | 0.2803571453742730 | 0.3462195264861360 |
| 0.3031976262321310 | 0.3432099006463110 | 0.3273119529240240 |
| 0.2345004687098780 | 0.4732275251579070 | 0.3318541153321470 |
| 0.2912284073562650 | 0.5383445457452150 | 0.3547822397699770 |
| 0.4894148846162730 | 0.5523581078886770 | 0.4667719127884010 |
| 0.3804987774759910 | 0.6125036681166500 | 0.4966136409224650 |
| 0.3827587282839100 | 0.6285646303320610 | 0.5520902431362200 |
| 0.4977207772665730 | 0.5775273505351670 | 0.5797722814513080 |
| 0.6086645691757980 | 0.5140784294957380 | 0.5517322673891150 |
| 0.6028142087377610 | 0.5052384746876180 | 0.4960174063352150 |
| 0.4834285481231160 | 0.4981056762551890 | 0.1481418261523170 |
| 0.4035529208721400 | 0.6357735604758600 | 0.2674687663496260 |
| 0.5757418904546420 | 0.4469962911976040 | 0.2647183935015450 |
| 0.7414186502852900 | 0.4150282097904870 | 0.3553367265211930 |
| 0.3690863017905640 | 0.7995397593869310 | 0.3886066676226130 |

|                    |                    |                    |
|--------------------|--------------------|--------------------|
| 0.8410437125832470 | 0.5399620378336220 | 0.3102623886185760 |
| 0.7067735579335450 | 0.7929534129389160 | 0.3034950496630260 |
| 0.4669633145040550 | 0.9234512496160200 | 0.3402691237383170 |
| 0.5980455031131980 | 0.2845253810005870 | 0.3892297482957760 |
| 0.4954754976049940 | 0.1555439715796700 | 0.3396663343123760 |
| 0.2516247261761130 | 0.2793214388845420 | 0.3037495225047050 |
| 0.1163325088632390 | 0.5339527812743570 | 0.3121082408531600 |
| 0.2235445070346190 | 0.6651547927326570 | 0.3541613022721070 |
| 0.2674638131098200 | 0.6644433467648120 | 0.4709023450841370 |
| 0.2759166199653800 | 0.6941681446115420 | 0.5789960601562420 |
| 0.5018728172170520 | 0.5896866655920370 | 0.6333884627004160 |
| 0.7188384780509750 | 0.4632239815314450 | 0.5789935661380700 |
| 0.7119528904203820 | 0.4443498965731300 | 0.4699080695973270 |
| 0.4853217850856630 | 0.5441696901108230 | 0.4040516061894540 |
| 0.3996135178085390 | 0.4706908691776020 | 0.2567864970434580 |
| 0.3131059805497980 | 0.6701679089423440 | 0.2662088785820400 |
